# Supplementary material
Source: HighWire-hosted journal article supplement (http://www.annfammed.org/highwire/filestream/7792/field_highwire_adjunct_files/0/Haidet_Appendix.pdf)
Supplement: Haidet_Appendix.pdf [file Haidet_Appendix.pdf]

**Online Supplementary Material**

Haidet P. Jazz and the 'art' of medicine: improvisation in the medical encounter. *Ann Fam Med*. 2007;5(1):164-169.

<http://www.annfammed.org/cgi/content/full/5/2/164/DC1>

---

**Supplemental Appendix**

The essay "Jazz and the 'Art' of Medicine: Improvisation in the Medical Encounter" refers to 3 songs. As a convenience to readers, the *Annals* is happy to provide links to several music download services. Readers may choose to visit these or other music download services to listen to samples or to purchase the songs. The *Annals of Family Medicine* does not endorse a music download service.

---

**Music Download Services**

**iTunes**

\$0.99 per song, no previews  
<http://www.apple.com/itunes/>

System requirements:

- Windows requirements
  - Windows 2000 or XP
  - QuickTime 7.0.3 (included with iTunes software)
- Macintosh requirements
  - Macintosh OS X 10.2.8 or higher
  - QuickTime 6.5.2 or higher
- iTunes software

All 3 songs are available. Searching requires downloading of iTunes software.

**Napster Light**

\$0.99 per song, 30-second preview clips  
(This download service also has a subscription service.)  
<http://www.napster.com/>

System requirements:

- Windows 2000 or XP
- Internet Explorer 5.1 or higher
- Windows Media Player 7.1 or higher
- Napster software

**Real Rhapsody**

\$0.99 per song, preview clips  
(This download service also has a subscription service.)  
<http://www.rhapsody.com/?pageid=rotw.albumpage>

## Online Supplementary Data

<http://www.annfammed.org/cgi/content/full/5/2/164/DC1>

System requirements:

- Windows 98 SE, 2000, Millennium Edition, or XP
- Internet Explorer 5.5 or higher
- Rhapsody software

"All Blues" (album *Kind of Blue*), Miles Davis

<http://www.rhapsody.com/album?albumId=237288&pageid=rotw.searchalbum&pageregion=A1>

"Giant Steps" (album *Giant Steps*), John Coltrane

<http://www.rhapsody.com/album?albumId=214750&pageid=rotw.searchalbum&pageregion=A1>

"Waltz for Debby" (album *Waltz for Debby*), Bill Evans Trio

<http://www.rhapsody.com/album?albumId=6528185&pageid=rotw.searchalbum&pageregion=A1>

### Walmart.com Music Downloads

\$0.88 per song, 30-second preview clips

<http://www.walmart.com/music>

System requirements:

- Windows PC
- Windows 98 SE, 2000, Millennium Edition, or XP
- Internet Explorer 6.0 or higher
- Windows Media Player 9

"All Blues" (album *Kind of Blue*), Miles Davis

<http://musicdownloads.walmart.com/catalog/servlet/AlbumServlet?id=49585>

"Giant Steps" (album *Giant Steps*), John Coltrane

<http://musicdownloads.walmart.com/catalog/servlet/AlbumServlet?id=78308>

"Waltz for Debby" (album *Waltz for Debby*), Bill Evans Trio

<http://musicdownloads.walmart.com/catalog/servlet/AlbumServlet?id=89478>

### Yahoo! Music Engine

\$0.99 per song, 30-second preview clips

(This download service also has a subscription service.)

<http://music.yahoo.com/>

System requirements:

- Windows 2000 or XP
- Internet Explorer 6.0 or higher
- Windows Media Player 9.0 or higher

"All Blues" (album *Kind of Blue*), Miles Davis

<http://music.yahoo.com/release/168892>

"Giant Steps" (album *Giant Steps*), John Coltrane

<http://music.yahoo.com/release/22426861>

"Waltz for Debby" (album *Waltz for Debby*), Bill Evans Trio

<http://music.yahoo.com/release/175479>
